# Supplementary material for: Structure of a eukaryotic cholinephosphotransferase-1 reveals mechanisms of substrate recognition and catalysis
Source: PubMed Central journal article supplement (PMC10182977; doi:10.1038/s41467-023-38003-9), 2023-05-13
Supplement: 41467_2023_38003_MOESM1_ESM.pdf [file 41467_2023_38003_MOESM1_ESM.pdf]

Supplementary Figures

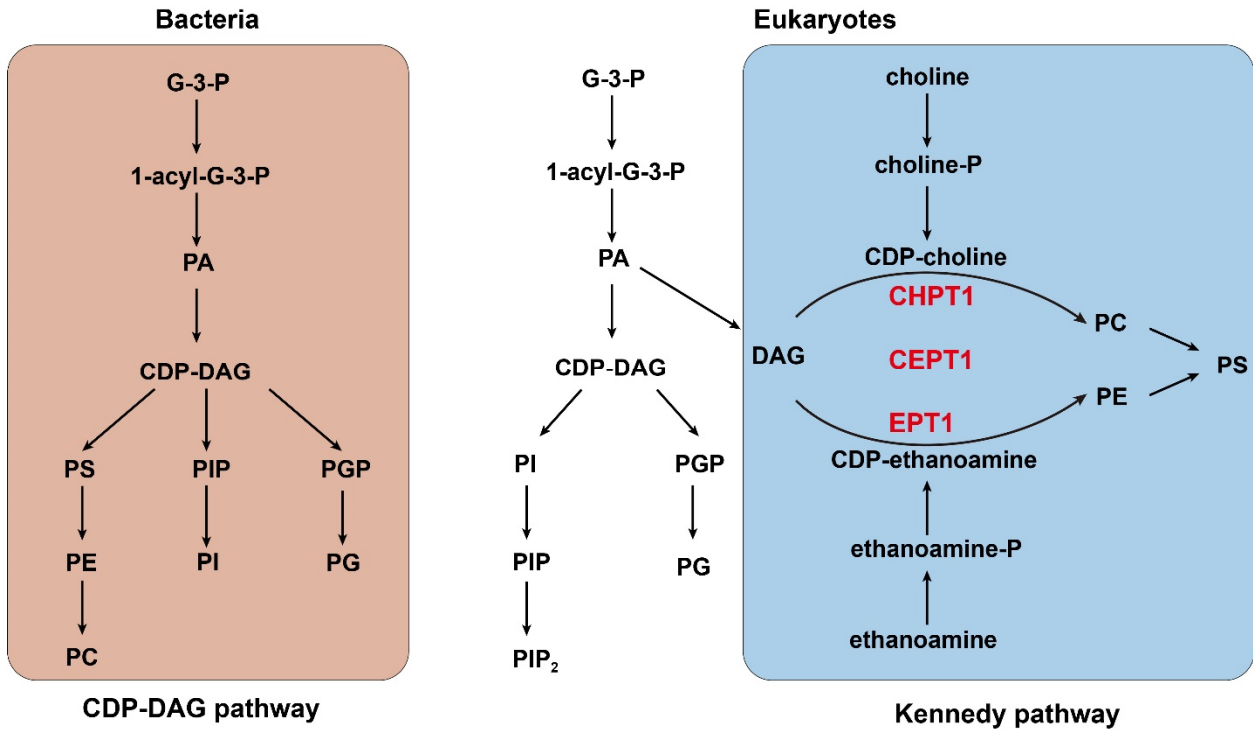

**Supplementary Figure 1. Phospholipids synthesis pathways in bacteria and eukaryotic cells. Left:**

In bacteria, the main pathway for phospholipids synthesis is the CDP-DAG pathway. **Right:** In most of eukaryotic cells, PC, PE and PS are synthesized through the Kennedy pathway. PI and PG are synthesized through the CDP-DAG pathway.

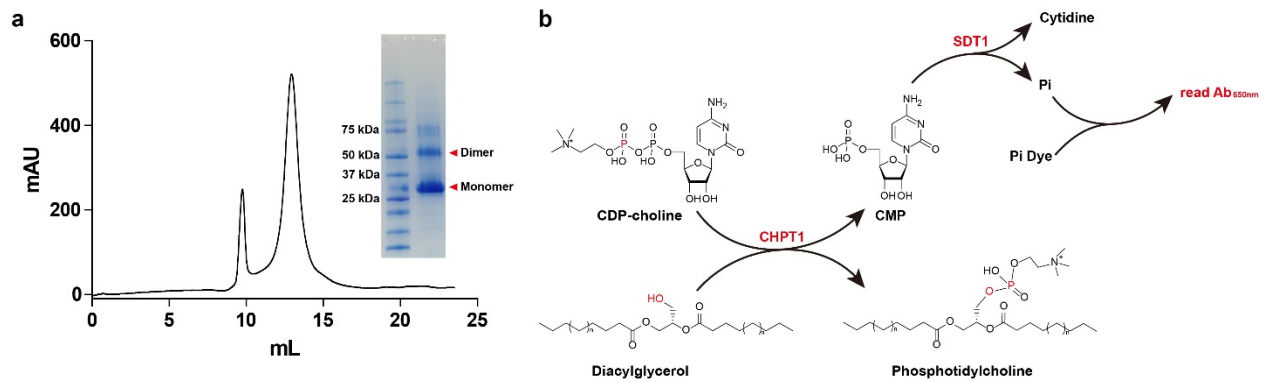

**Supplementary Figure 2. Purification and functional assay of xlCHPT1.** **a.** Size-exclusion chromatography profile and SDS-PAGE of xlCHPT1. Both dimer and monomer bands are visible on the SDS-PAGE. The results are representative of over 3 independent repeats of the xlCHPT1 purification experiment. **b.** xlCHPT1 reaction is coupled to that of SDT1 to monitor the production of CMP, which is quantified with the absorption at 650 nm.

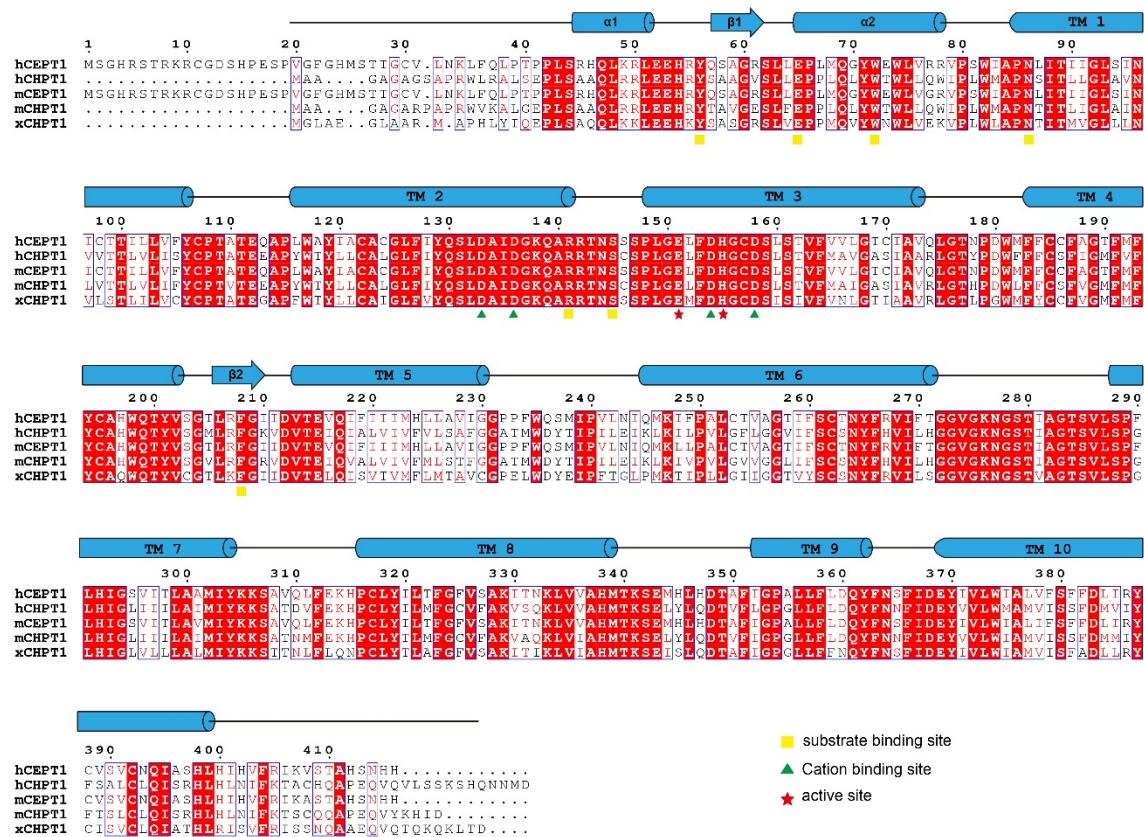

**Supplementary Figure 3. Sequence alignment.** Human CEPT1(hCEPT1, [Q9Y6K0](https://www.uniprot.org/uniprotkb/Q9Y6K0))

[\[https://www.uniprot.org/uniprotkb/Q9Y6K0/entry\]](https://www.uniprot.org/uniprotkb/Q9Y6K0/entry)), human CHPT1(hCHPT1, [Q8WUD6](https://www.uniprot.org/uniprotkb/Q8WUD6))

[\[https://www.uniprot.org/uniprotkb/Q8WUD6/entry\]](https://www.uniprot.org/uniprotkb/Q8WUD6/entry)), mouse CEPT1 (mCEPT1, [Q8BGS7](https://www.uniprot.org/uniprotkb/Q8BGS7))

[\[https://www.uniprot.org/uniprotkb/Q8BGS7/entry\]](https://www.uniprot.org/uniprotkb/Q8BGS7/entry)), mouse CHPT1 (mCHPT1, [Q8C025](https://www.uniprot.org/uniprotkb/Q8C025))

[\[https://www.uniprot.org/uniprotkb/Q8C025/entry\]](https://www.uniprot.org/uniprotkb/Q8C025/entry)), frog CHPT1 (xCHPT1, [Q4KLV1](https://www.uniprot.org/uniprotkb/Q4KLV1))

[\[https://www.uniprot.org/uniprotkb/Q4KLV1/entry\]](https://www.uniprot.org/uniprotkb/Q4KLV1/entry)) are aligned using the Clustal Omega server<sup>42</sup>.

Secondary structural elements of xCHPT11 are marked above the alignment. Residues are colored based on their conservation using the ESPrict server<sup>43</sup>. Residues at the CDP-choline binding site are marked with yellow squares. Cation binding site residues are marked in green triangles. Residues in the active site are marked with red stars.

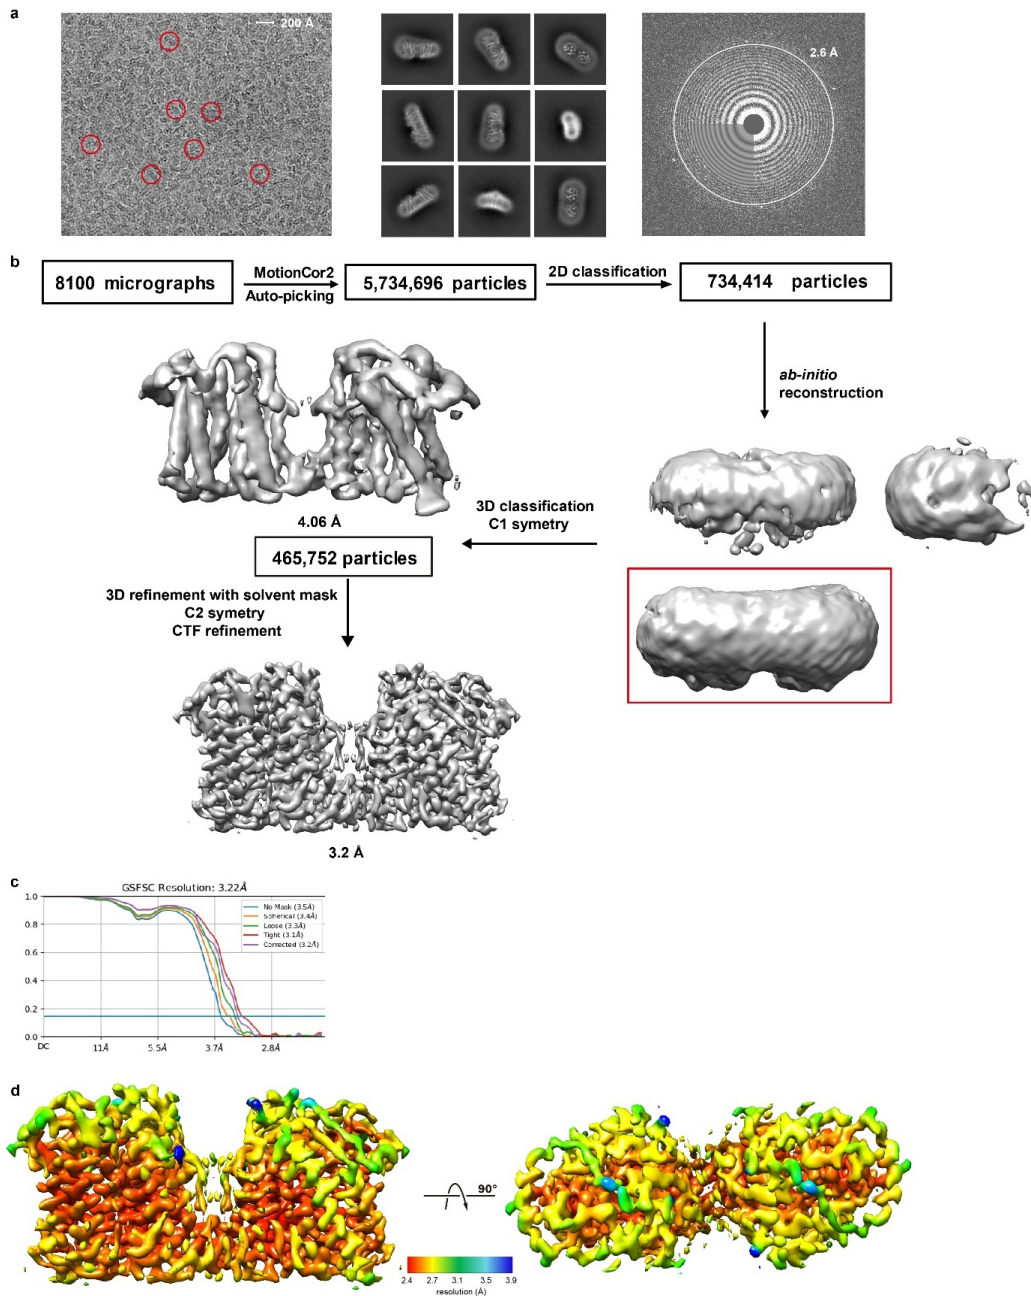

**Supplementary Figure 4. Data processing and map resolution of xICHPT1-Mg<sup>2+</sup>-CDP data set. a.** A representative micrograph of xICHPT1 (left), its Fourier transform (right) and representative 2D class averages (middle). Representative particles are highlighted in red circles. **b.** A flowchart for data processing and the final map of xICHPT1. **c.** The gold-standard Fourier shell correlation curve for the final map. **d.** Local resolution map of xICHPT1 shown in two orientations.

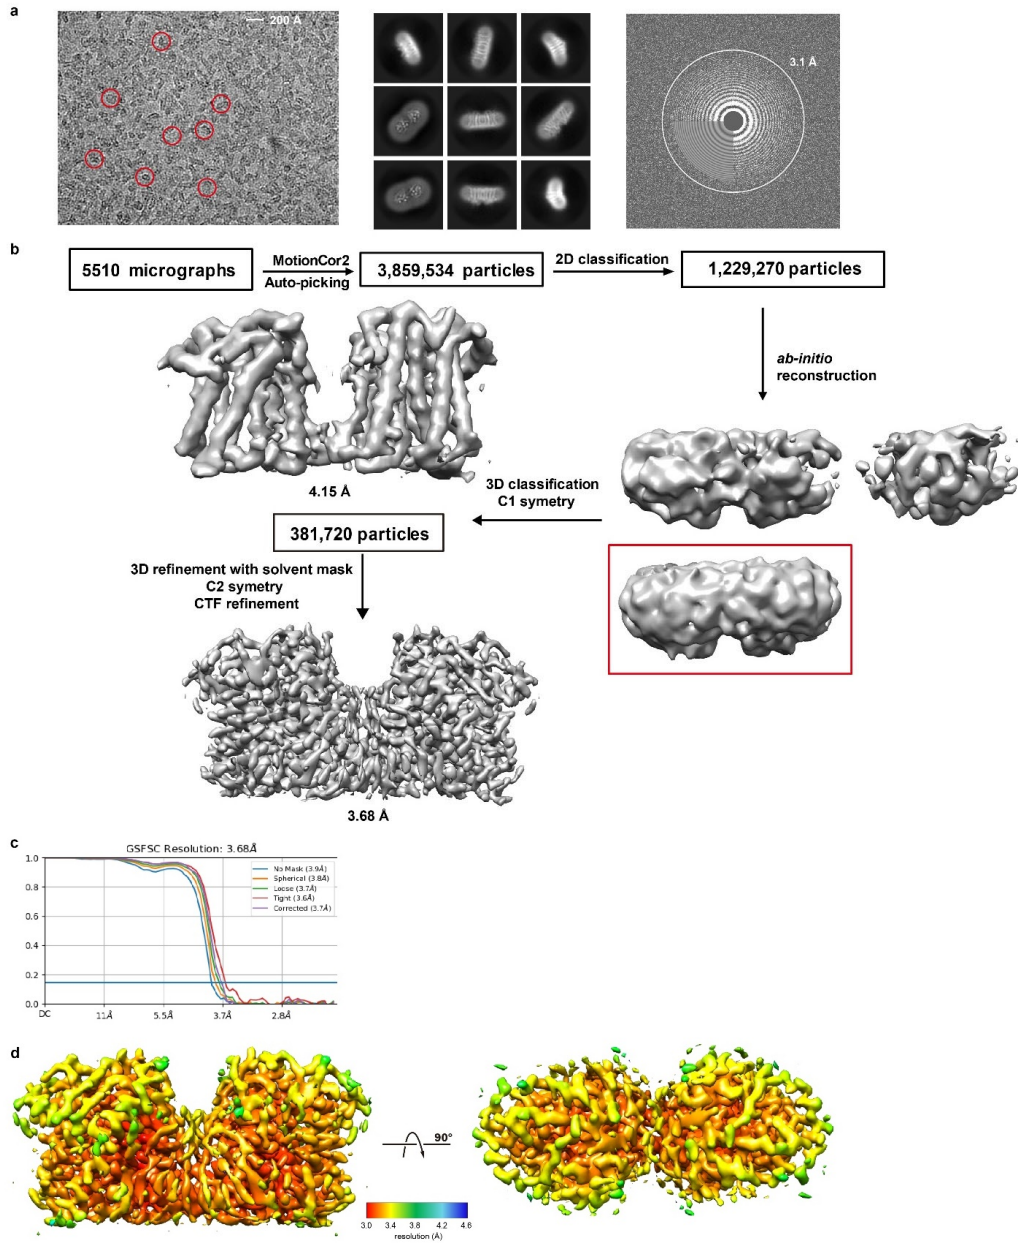

**Supplementary Figure 5. Data processing and map resolution of xlCHPT1-Mg<sup>2+</sup>-CDP-choline data set. a.** A representative micrograph of xlCHPT1 (left), its Fourier transform (right) and representative 2D class averages (middle). Representative particles are highlighted in red circles. **b.** A flowchart for data processing and the final map of xlCHPT1. **c.** The gold-standard Fourier shell correlation curve for the final map. **d.** Local resolution map of xlCHPT1 shown in two orientations.

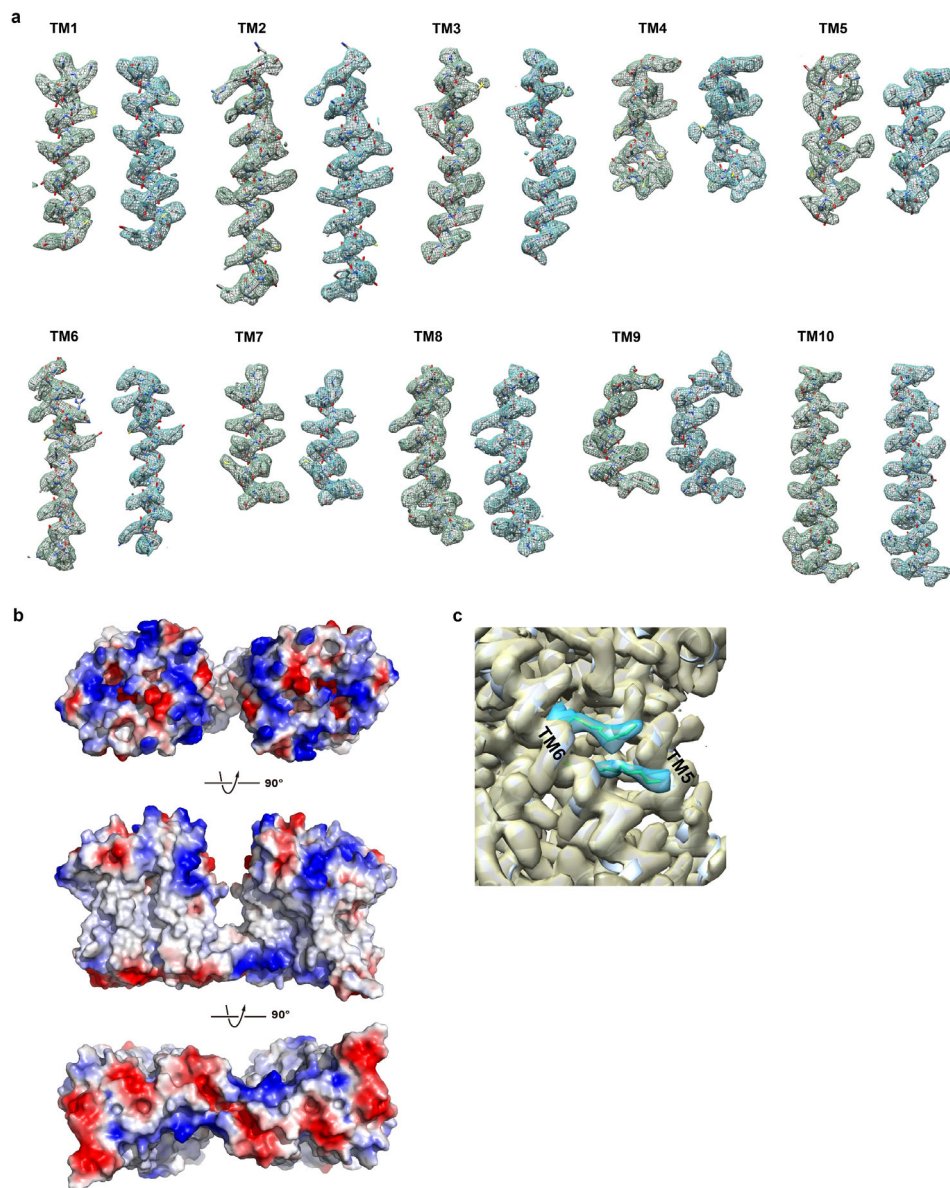

**Supplementary Figure 6. Density maps and structural model of xICHPT1.** **a.** Individual secondary structures of xICHPT1 are shown as gray sticks, contoured in their density. Density of the xICHPT1-Mg<sup>2+</sup>-CDP data set is shown green mesh and that of xICHPT1-Mg<sup>2+</sup>-CDP-choline data set is shown in blue mesh. **b.** Electrostatic surface representations of xICHPT1 dimer in three orientations. The electrostatic potential is calculated using the APBS plugin from Pymol<sup>44</sup>. **c.** A non-protein density (blue surface) in the slit between TM5 and TM6 sufficient for two acyl chains. The xICHPT1 protein density is shown as yellow surface.

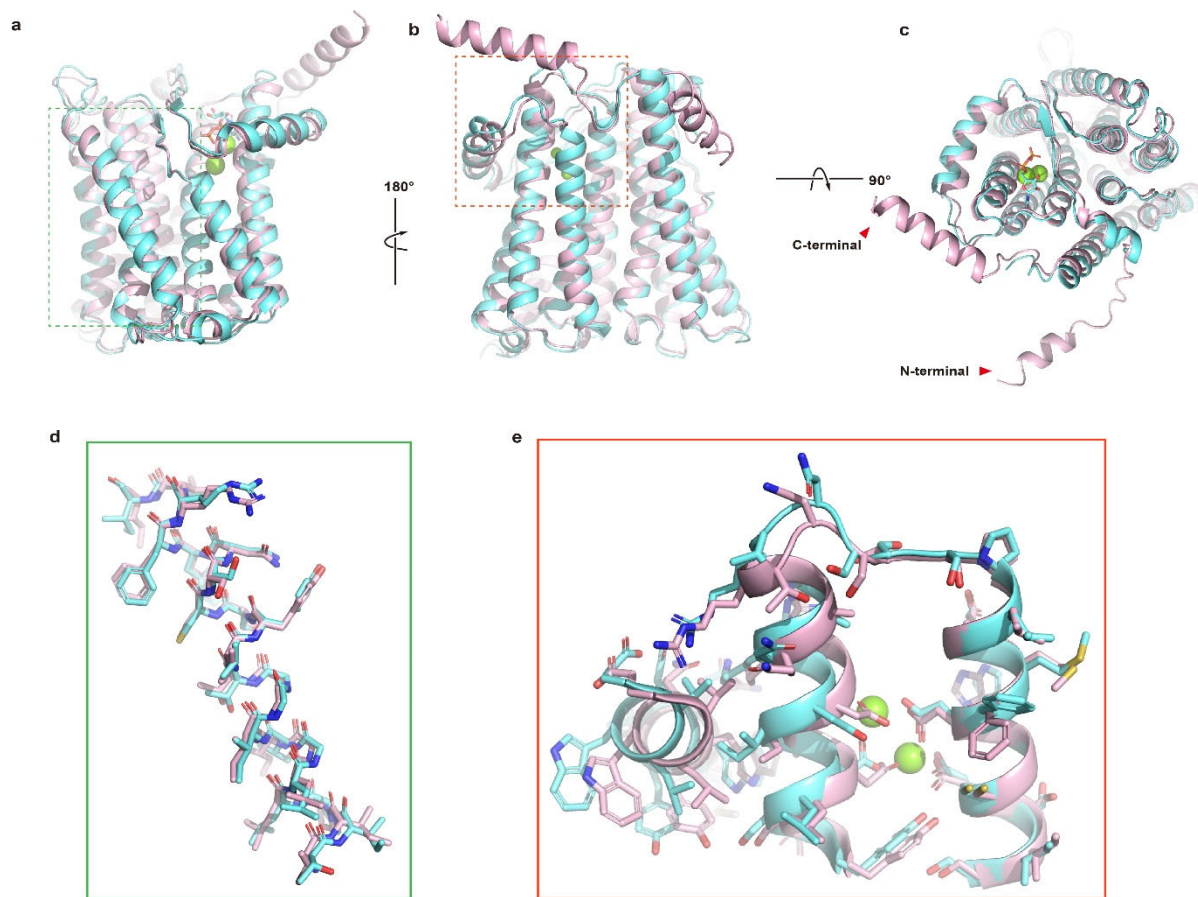

**Supplementary Figure 7. Alignment of xICHPT1 structure and alphafold predicted model. a-c.**

Overall comparison of xICHPT1 structure (cyan) with alphafold predicted model (pink) in three orientations. **d-e.** Detailed residues alignment of the highlighted helix in panel **a** and panel **b**. Residues are shown in sticks.

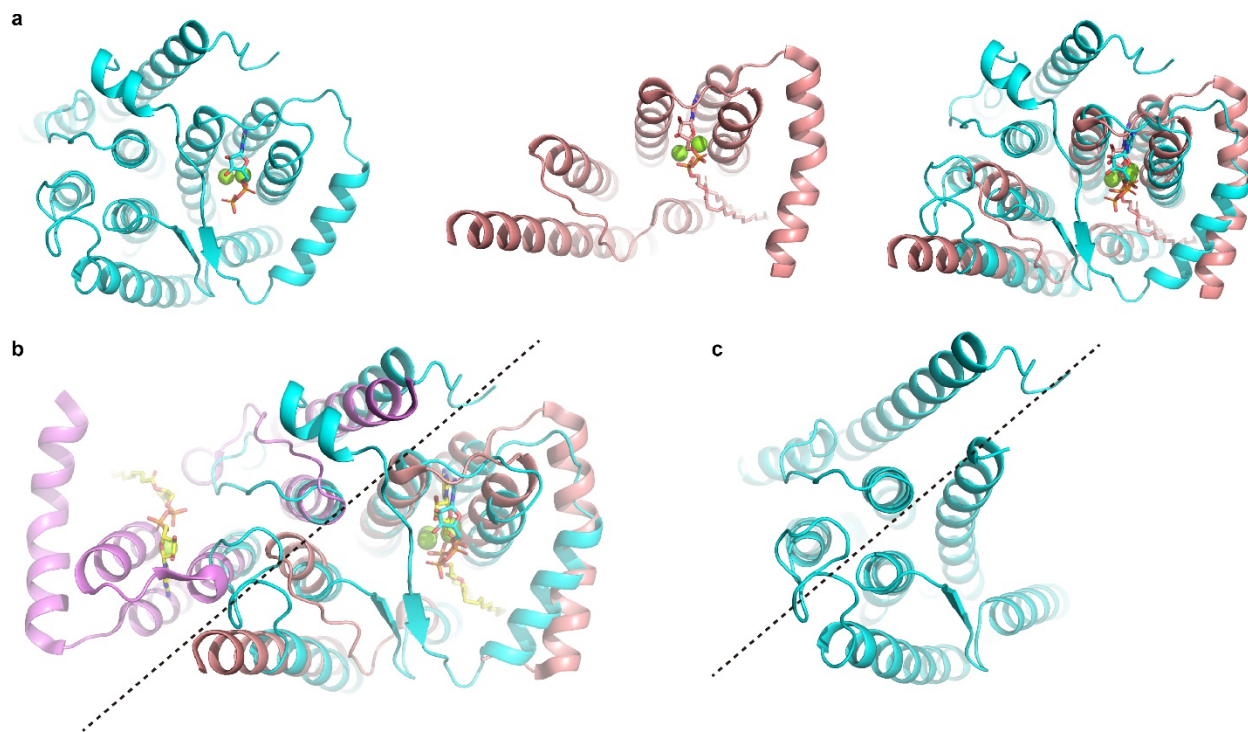

**Supplementary Figure 8. Structural symmetry in xICHPT1.** **a.** Structure alignment of xICHPT1 (cyan) and RsPIPS (5D92 [<http://doi.org/10.2210/pdb5D92/pdb>], pink). **b.** Structural alignment of xICHPT1 monomer (cyan) with RsPIPS dimer (pink and purple). **c.** Structural symmetry between TM3-6 and TM7-10 of xICHPT1.



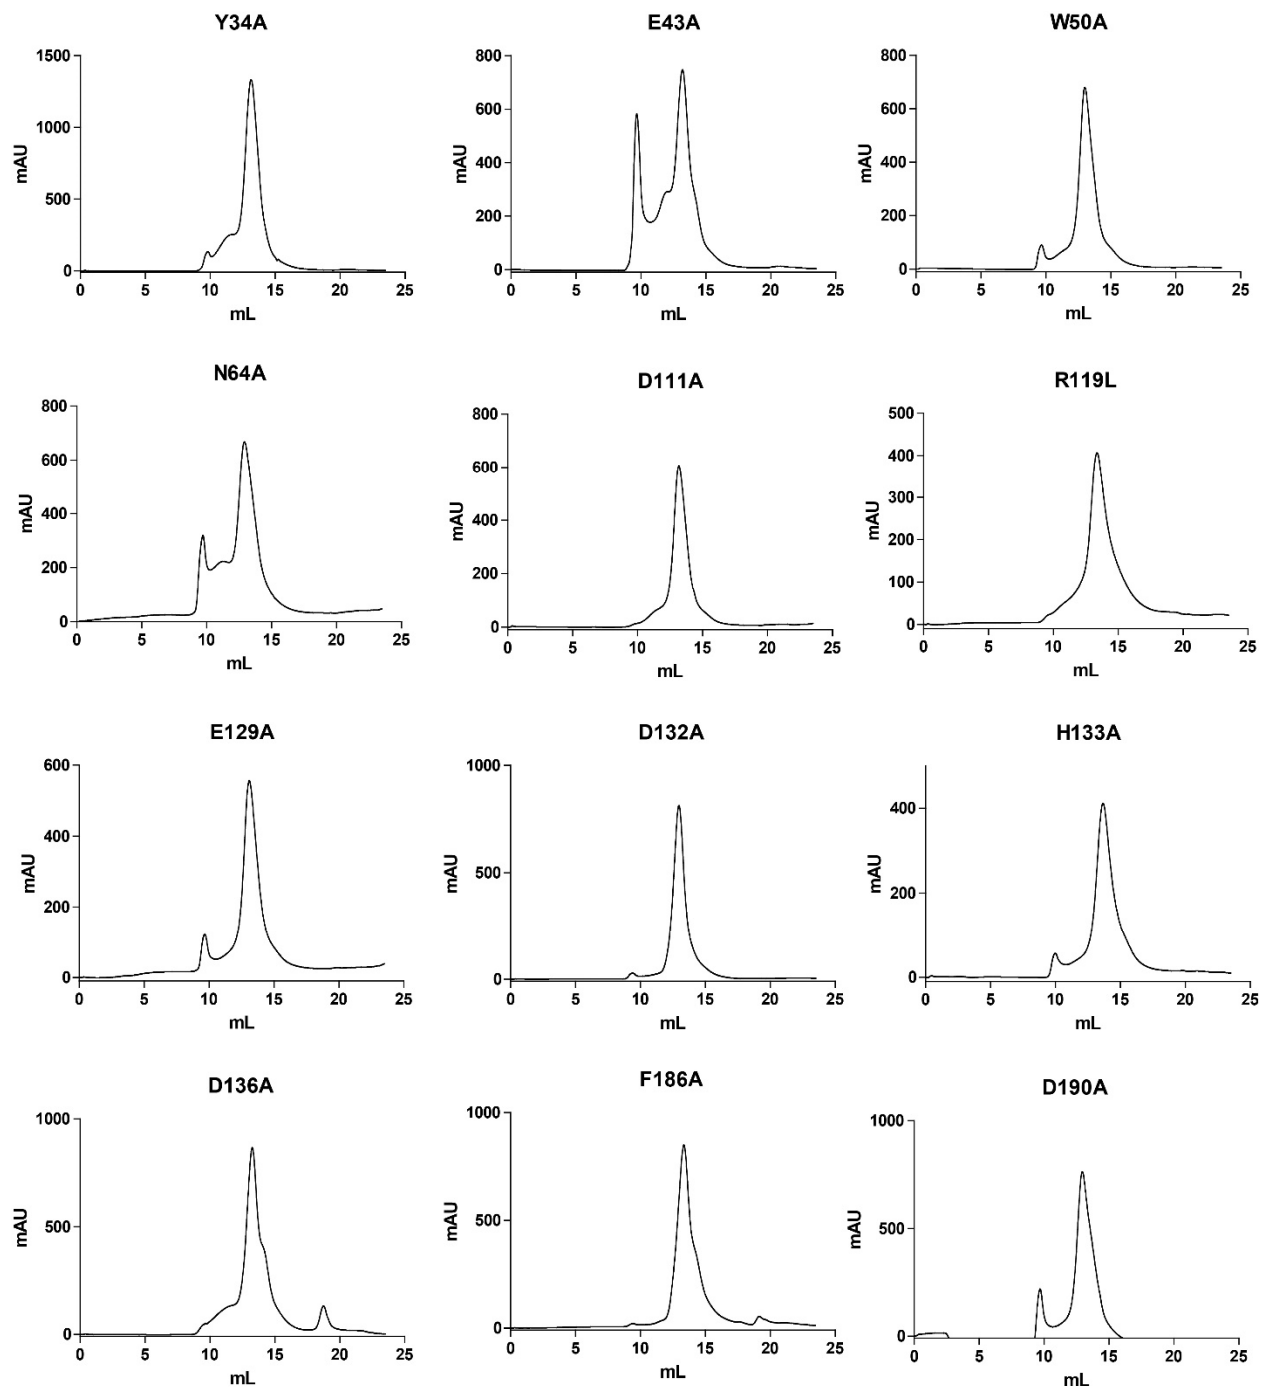

Supplementary Figure 9. Size-exclusion chromatography profiles of xlCHPT1 mutants.



[\[https://www.ncbi.nlm.nih.gov/protein/NP\\_001238284.2\]](https://www.ncbi.nlm.nih.gov/protein/NP_001238284.2)). The conserved CDP-AP signature motif and proposed catalytic site residues are highlighted.

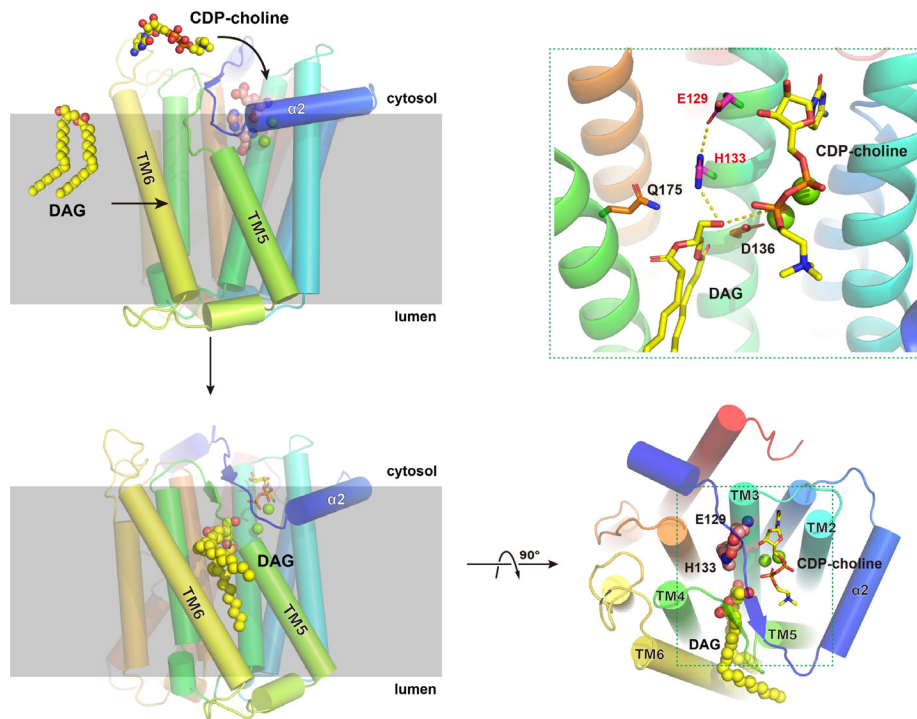

**Supplementary Figure 11. Proposed entry and docking of DAG in xICHPT1.** xICHPT1 is shown as cartoon, DAG and CDP-choline are shown as yellow spheres or sticks. Active site residues, E129 and H133, are shown as sticks or spheres. Residues that may interact with DAG are shown as orange sticks.

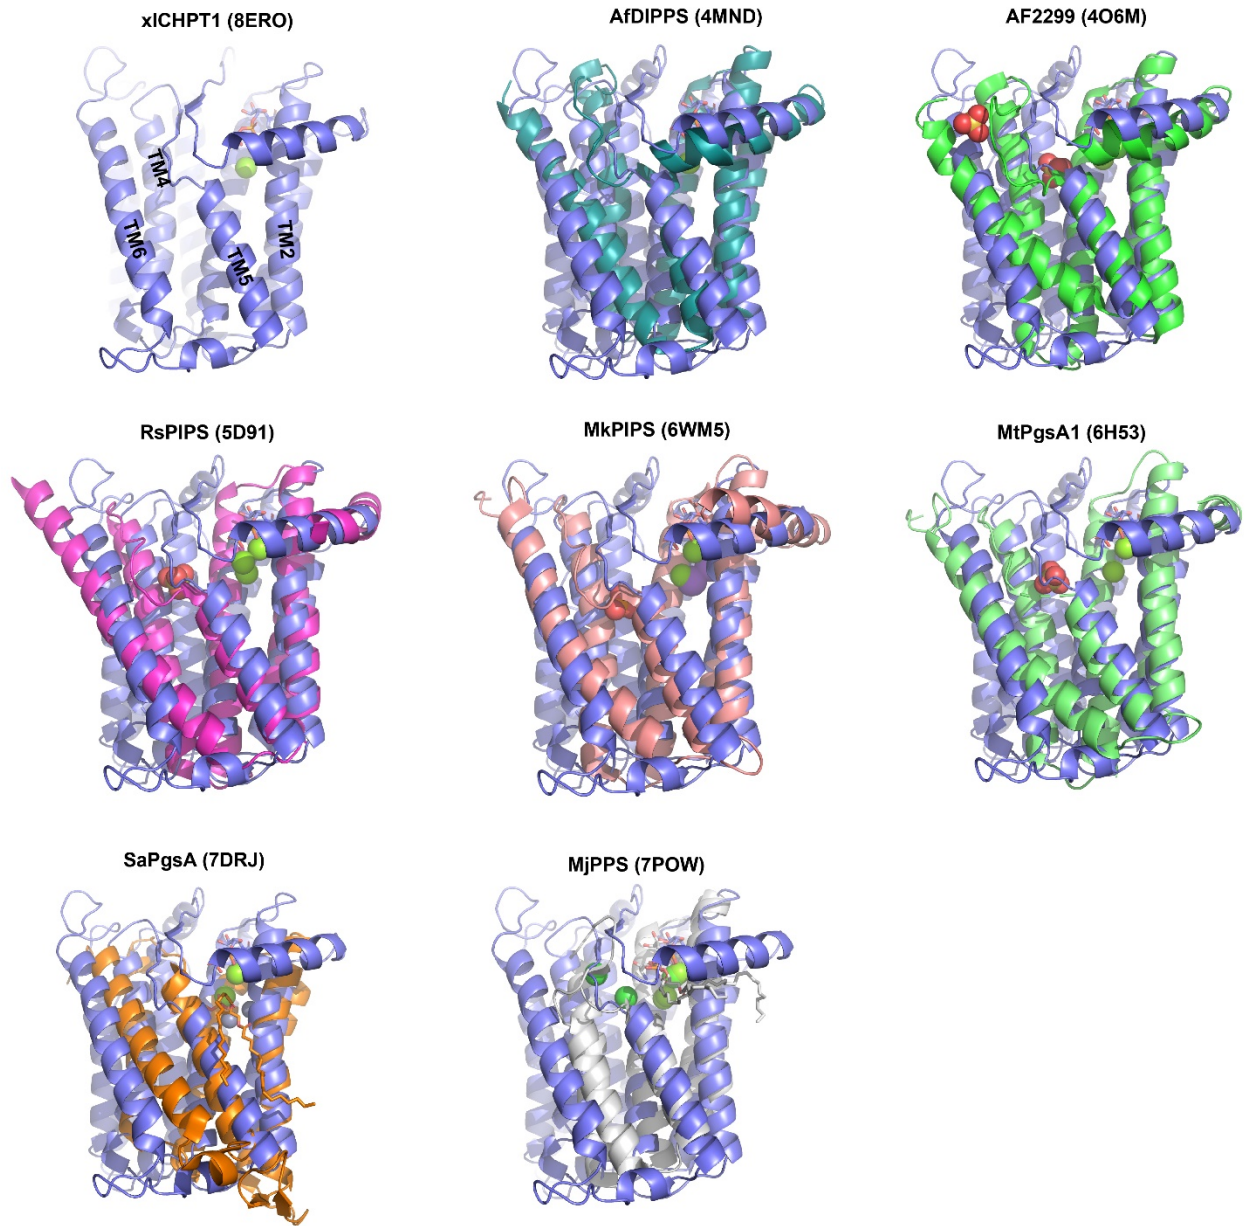

**Supplementary Figure 12. Structural comparison of xICHPT1 and bacteria CDP-APs.** Structures of xICHPT1 is shown as purple cartoon. All other bacteria CDP-APs are shown in other different colors.

|          | XICHPT1                                                                           | RsPIPS                                                                            | SaPgsA                                                                              |
|----------|-----------------------------------------------------------------------------------|-----------------------------------------------------------------------------------|-------------------------------------------------------------------------------------|
| Acceptor | 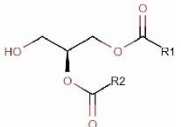 |  |  |
| Donor    |  |  |  |
| Product  |  |  |  |

b

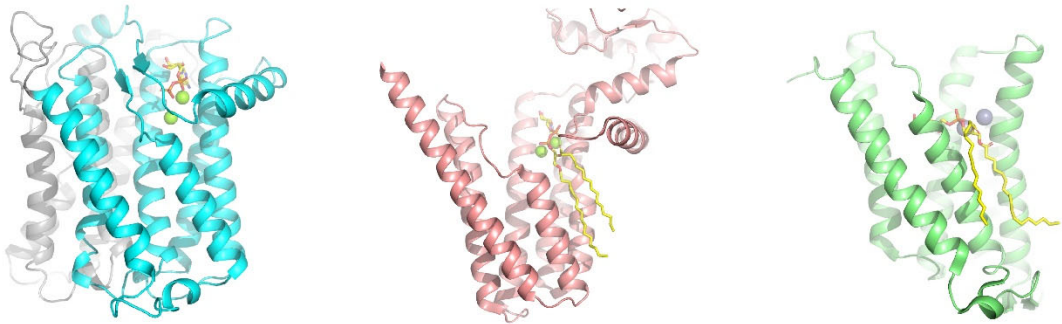

c

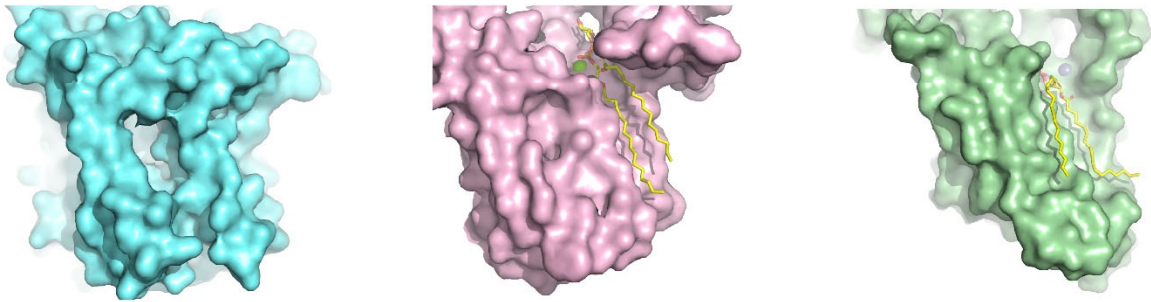

d

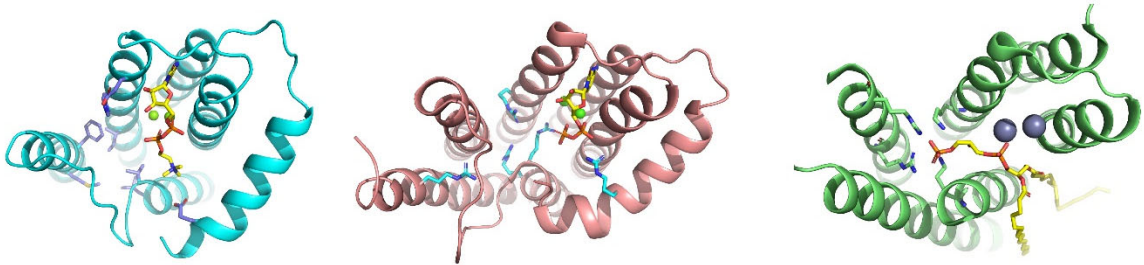

**Supplementary Figure 13. Structures comparison of xICHPT1, bacterial RsPIPS (pdb code 5D92 [<http://doi.org/10.2210/pdb5D92/pdb>]) and SaPgsA (pdb code 7DRJ [<http://doi.org/10.2210/pdb7DRJ/pdb>]).**

**a.** Substrates and products of xICHPT1, RsPIPS and SaPgsA.

**b.** Structure of xICHPT1 that highlights CDP-choline, structure of RsPIPS that highlights CDP-DAG and structure of SaPgsA that highlights PGP.

**c.** Space-filled representation of xICHPT1, RsPIPS and SaPgsA. xICHPT1 is shown in cyan, RsPIPS is in pink, and SaPgsA is in green.

**d.** Comparison of DAG or inositol phosphate binding sites in the three structures, with relevant residues shown as sticks.

**Supplementary Table 1. Summary of cryo-EM data collection, processing, and structural refinement**

|                                                     | xlCHPT1-Mg <sup>2+</sup> - CDP-choline<br>(EMD-28557)<br>(PDB 8ERP) | xlCHPT1-Mg <sup>2+</sup> - CDP<br>(EMD- 28556)<br>(PDB 8ERO) |
|-----------------------------------------------------|---------------------------------------------------------------------|--------------------------------------------------------------|
| <b>Data collection and processing</b>               |                                                                     |                                                              |
| Magnification                                       | 81,000                                                              | 81,000                                                       |
| Voltage (kV)                                        | 300                                                                 | 300                                                          |
| Electron exposure (e <sup>-</sup> /Å <sup>2</sup> ) | 50                                                                  | 50                                                           |
| Defocus range (μm)                                  | [-2.0, -0.8]                                                        | [-2.0, -0.8]                                                 |
| Pixel size (Å)                                      | 1.1                                                                 | 1.1                                                          |
| Symmetry imposed                                    | C2                                                                  | C2                                                           |
| Initial particle images (no.)                       | 3,859,534                                                           | 5,734,696                                                    |
| Final particle images (no.)                         | 381,720                                                             | 465,752                                                      |
| Map resolution (Å)                                  | 3.7                                                                 | 3.2                                                          |
| FSC threshold                                       | 0.143                                                               | 0.143                                                        |
| Map resolution range (Å)                            | 2.9-4.6                                                             | 2.4-4.0                                                      |
| <b>Refinement</b>                                   |                                                                     |                                                              |
| Initial model used (PDB code)                       | 8ERP                                                                | 8ERO                                                         |
| Model resolution (Å)                                | 3.8                                                                 | 3.4                                                          |
| FSC threshold                                       | 0.5                                                                 | 0.5                                                          |
| Model resolution range (Å)                          | 3.5-3.9                                                             | 2.8-3.5                                                      |
| Map sharpening <i>B</i> factor (Å <sup>2</sup> )    | -100                                                                | -100                                                         |
| Model composition                                   |                                                                     |                                                              |
| Non-hydrogen atoms                                  | 6058                                                                | 6156                                                         |
| Protein residues                                    | 728                                                                 | 728                                                          |
| Ligands                                             | 26                                                                  | 32                                                           |
| <i>B</i> factors (Å <sup>2</sup> )                  |                                                                     |                                                              |
| Protein                                             | 35.5                                                                | 34.6                                                         |
| Ligand                                              | 24.8                                                                | 44.5                                                         |
| R.m.s. deviations                                   |                                                                     |                                                              |
| Bond lengths (Å)                                    | 0.003                                                               | 0.003                                                        |
| Bond angles (°)                                     | 0.729                                                               | 0.639                                                        |
| Validation                                          |                                                                     |                                                              |
| MolProbity score                                    | 1.79                                                                | 1.80                                                         |
| Clashscore                                          | 7.21                                                                | 5.36                                                         |
| Poor rotamers (%)                                   | 0                                                                   | 0                                                            |
| Ramachandran plot                                   |                                                                     |                                                              |
| Favored (%)                                         | 94.2                                                                | 91.2                                                         |
| Allowed (%)                                         | 5.8                                                                 | 8.8                                                          |
| Disallowed (%)                                      | 0                                                                   | 0                                                            |



**Supplementary Table 2. Sequence of primers**

| <b>Oligo name</b> | <b>Oligo sequence (5' to 3')</b> |
|-------------------|----------------------------------|
| Y34A-F            | GAGGAACACAAGGCTTCCGCTTCT         |
| Y34A-R            | CTTGTGTTCCCTCCAGCTTCTTCAG        |
| E43L-F            | AGGTCTCTCGTTCTCCCCCTATG          |
| E43L-R            | AACGAGAGACCTTCCAGAAGCGGA         |
| W50A-F            | ATGCAGGTGTACGCTAACTGGTTG         |
| W50A-R            | GTACACCTGCATAGGGGGCTCAAC         |
| N64V-F            | TGGCTGGCCCCGGTCACAATCACC         |
| N64V-R            | CGGGGCCAGCCACAATGGAACCTT         |
| D111A-F           | TACCAGAGCCTCGCTGCTATCGAT         |
| D111A-R           | GAGGCTCTGGTACACGAACAGGCC         |
| R119L-F           | GGAAAGCAAGCCCTCCGCACCAAC         |
| R119L-R           | GGCTTGCTTTCCATCGATAGCGTC         |
| E129A-F           | AGCCCGTTGGGAGCTATGTTTCGAC        |
| E129A-R           | TCCCAACGGGCTAGAGGAGTTGGT         |
| D132A-F           | GGAGAAATGTTTCGCTCACGGTTGC        |
| D132A-R           | GAACATTTCTCCCAACGGGCTAGA         |
| H133A-F           | GAAATGTTTCGACGCTGGTTGCGAT        |
| H133A-R           | GTCGAACATTTCTCCCAACGGGCT         |
| D136A-F           | GACCACGGTTGCGCTAGCATCTCA         |
| D136A-R           | GCAACCGTGGTTCGAACATTTCTCC        |
| F186A-F           | GGTACCCTGAAGGCTGGCATCATC         |
| F186A-R           | CTTCAGGGTACCACACACGTATGT         |

## References:

42. Dineen, S. A. *et al.* Fast, scalable generation of high-quality protein multiple sequence alignments using Clustal Omega. *Mol. Syst. Biol.* **7**, 539 (2011).
43. Robert, X. & Gouet, P. Deciphering key features in protein structures with the new ENDscript server. *Nucleic Acids Res.* **42**, (2014).
44. Baker, N. A., Sept, D., Joseph, S., Holst, M. J. & McCammon, J. A. Electrostatics of nanosystems: Application to microtubules and the ribosome. *Proc. Natl. Acad. Sci. U. S. A.* **98**, 10037–10041 (2001).
45. Landau, M. *et al.* ConSurf 2005: The projection of evolutionary conservation scores of residues on protein structures. *Nucleic Acids Res.* **33**, (2005).
